# Supplementary material for: Stakeholder Perspectives of Clinical Artificial Intelligence Implementation: Systematic Review of Qualitative Evidence
Source: PubMed Central journal article supplement (PMC9875023; doi:10.2196/39742), 2023-01-10
Supplement: jmir_v25i1e39742_app5.pdf [file jmir_v25i1e39742_app5.pdf]

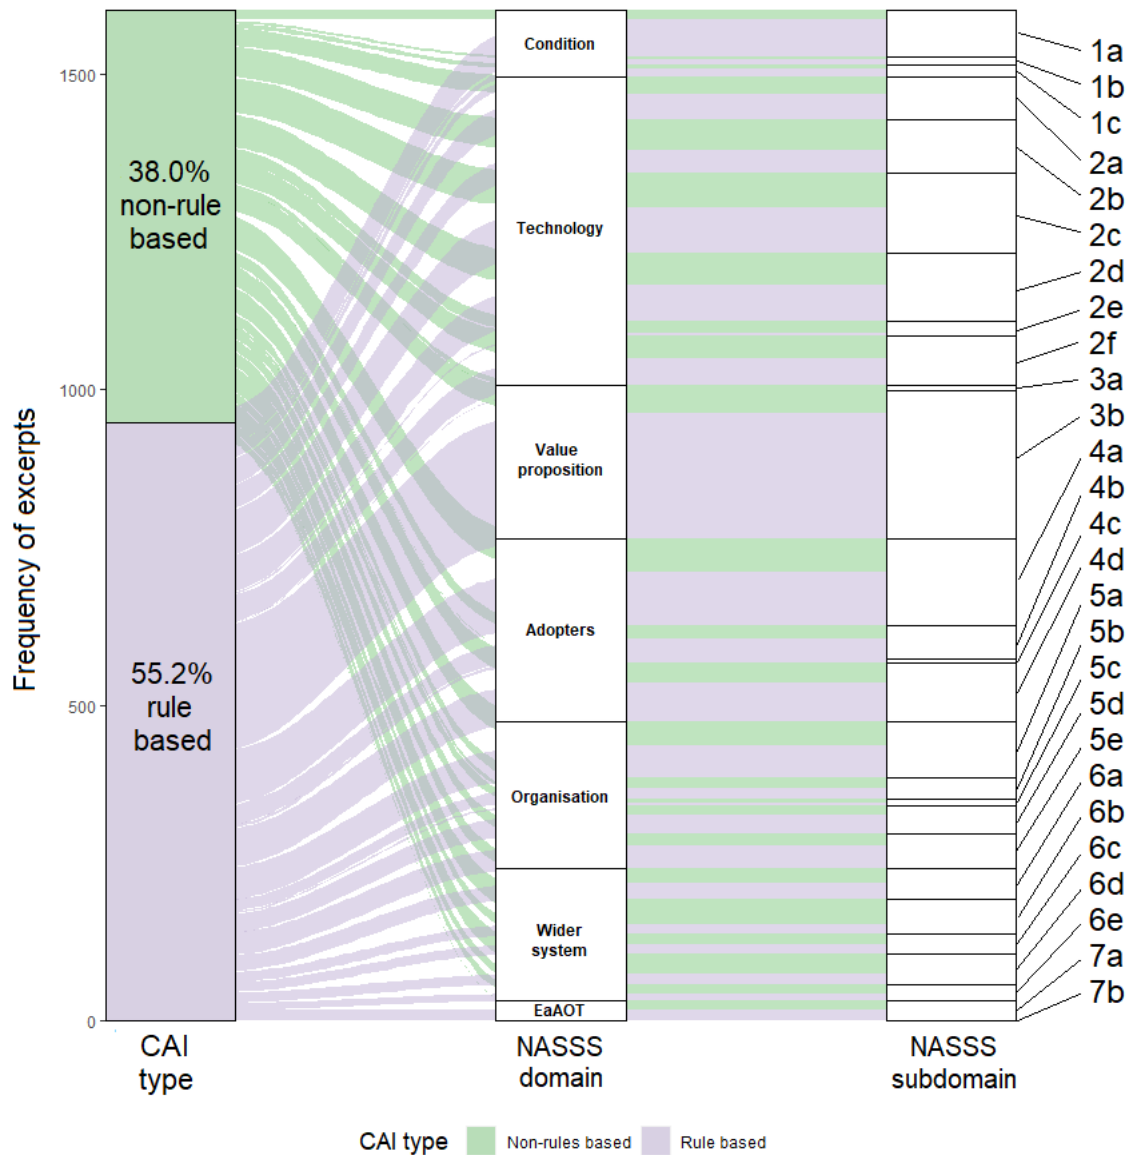

Sankey plot and accompanying table describing the relative frequency with which excerpts from eligible studies of rule-based and non-rule-based clinical artificial intelligence (CAI) relate to the various sub-domains of an adapted Non-adoption, Abandonment, Scale-up, Spread and Sustainability (NASSS) framework.

| NASSS domain                               | NASSS sub-domain                                      | Excerpts by NASSS sub-domain |                |
|--------------------------------------------|-------------------------------------------------------|------------------------------|----------------|
|                                            |                                                       | Non-rule-based CAI           | Rule-based CAI |
| <b>1. Condition</b>                        | 1a Nature of condition or illness                     | 21.6%                        | 78.4%          |
|                                            | 1b Comorbidities                                      | 30.8%                        | 69.2%          |
|                                            | 1c Sociocultural factors                              | 36.8%                        | 63.2%          |
| <b>2. Technology</b>                       | 2a Material properties                                | 40.6%                        | 59.4%          |
|                                            | 2b Knowledge to use it                                | 56.6%                        | 43.4%          |
|                                            | 2c Knowledge generated by it                          | 44.1%                        | 55.9%          |
|                                            | 2d Supply model                                       | 47.2%                        | 52.8%          |
|                                            | 2e Who owns the intellectual property?                | 87.0%                        | 13.0%          |
|                                            | 2f Care pathway positioning                           | 45.6%                        | 54.4%          |
| <b>3. Value proposition</b>                | 3a Supply-side value (to developer)                   | 88.9%                        | 11.1%          |
|                                            | 3b Demand-side value (to patient)                     | 15.0%                        | 85.0%          |
| <b>4. Adopters</b>                         | 4a Staff (role, identity)                             | 38.1%                        | 61.9%          |
|                                            | 4b Patient (simple v complex input)                   | 38.5%                        | 61.5%          |
|                                            | 4c Carers                                             | 16.7%                        | 83.3%          |
|                                            | 4d Relationships                                      | 35.5%                        | 64.5%          |
| <b>5. Organisation</b>                     | 5a Capacity to innovate in general                    | 43.3%                        | 56.7%          |
|                                            | 5b Readiness for this technology                      | 47.1%                        | 52.9%          |
|                                            | 5c Nature of adoption and/or funding decision         | 66.7%                        | 33.3%          |
|                                            | 5d Extent of change needed to organisational routines | 34.8%                        | 65.2%          |
|                                            | 5e Work needed to plan, implement and monitor change  | 35.2%                        | 64.8%          |
| <b>6. Wider system</b>                     | 6a Political/policy context                           | 47.9%                        | 52.1%          |
|                                            | 6b Regulatory/legal issues                            | 71.4%                        | 28.6%          |
|                                            | 6c Professional bodies                                | 51.6%                        | 48.4%          |
|                                            | 6d Socio-cultural context                             | 67.3%                        | 32.7%          |
|                                            | 6e Interorganisational networking                     | 57.7%                        | 42.3%          |
| <b>7. Embedding and adaption over time</b> | 7a Scope for adaption over time                       | 46.7%                        | 53.3%          |
|                                            | 7b Organisational resilience                          | 50.0%                        | 50.0%          |
