# Supplementary material for: Stakeholder Perspectives of Clinical Artificial Intelligence Implementation: Systematic Review of Qualitative Evidence
Source: J Med Internet Res. 2023 Jan 10;25:e39742. doi: 10.2196/39742 (PMC9875023; doi:10.2196/39742)
Supplement: Multimedia Appendix 2 [file jmir_v25i1e39742_app2.pdf]

| Year | Source                                                                                      | Title                                                                                                                                         | Exclusion criteria                                          |
|------|---------------------------------------------------------------------------------------------|-----------------------------------------------------------------------------------------------------------------------------------------------|-------------------------------------------------------------|
| 2019 | Proceedings of the American Academy of Sciences of the United States with Donald Geman      | How Safe Is AI Developed, Validated, and Implemented in Patient Care?                                                                         | Does not satisfy OECD definition of artificial intelligence |
| 2019 | AMIA 2019 Annual Symposium proceedings, AMIA Symposium                                      | How Safe Is AI Developed, Validated, and Implemented in Patient Care?                                                                         | Does not satisfy OECD definition of artificial intelligence |
| 2019 | Journal of World, Outcomes & Continence Nursing                                             | Continued Validation of an Interactive Digital Algorithm for Ostomy Care                                                                      | Does not satisfy OECD definition of artificial intelligence |
| 2019 | Psychiatric Rehabilitation Journal                                                          | Implementing CommonGround in a Community Mental Health Center: Lessons in a Computerized Decision Support System                              | Does not satisfy OECD definition of artificial intelligence |
| 2019 | Translational Vision Science and Technology                                                 | Artificial intelligence to reduce color health disparities: Moving from concept to implementation                                             | Does not satisfy OECD definition of artificial intelligence |
| 2019 | Journal of Health, Behavior, Society and Informatics                                        | User-centered development of a decision support module C- Studies in Health                                                                   | Does not satisfy OECD definition of artificial intelligence |
| 2019 | Health Services Research                                                                    | Sustained User Engagement in Health Information Technology: The Long Road from Implementation to System Optimization of Computer              | Does not satisfy OECD definition of artificial intelligence |
| 2019 | International Journal of Medical Informatics                                                | Utility evaluation of pharmacokinetics clinical decision support tools and clinical knowledge resources in a computerized provider order      | Does not satisfy OECD definition of artificial intelligence |
| 2019 | Journal of Biomedical Informatics                                                           | Screening and Referral for Physicians: Identifying a Reason for Reaction of Best Practice Recommendations in Pneumonia triage                 | Does not satisfy OECD definition of artificial intelligence |
| 2019 | JOURNAL OF WOMENS HEALTH                                                                    | Use of an Online Breast Cancer Risk Assessment and Patient Decision Aid in Primary Care Practices                                             | Does not satisfy OECD definition of artificial intelligence |
| 2019 | CANADIAN JOURNAL OF PAH REVEU CANADIENNE DE LA DOI                                          | Implementing high value back pain care in private physiotherapy in Australia: A qualitative evaluation of physiotherapists who participate    | Does not satisfy OECD definition of artificial intelligence |
| 2019 | Journal of Clinical Pharmacy and Therapeutics                                               | Artificial Intelligence in Hospital Pharmacy: An Antimicrobial Decision Support System to Manage Antibiotic Prescription in an ICU Ward       | Does not satisfy OECD definition of artificial intelligence |
| 2019 | Bulletin of the World Health Organization                                                   | Artificial intelligence in health care: Accountability and safety                                                                             | Does not satisfy OECD definition of artificial intelligence |
| 2019 | Journal of the American College of Radiology                                                | The Economic Logic for Clinical Decision Support is Changing                                                                                  | Does not satisfy OECD definition of artificial intelligence |
| 2019 | Expert Review of Clinical Pharmacology                                                      | Guiding principles for the use of knowledge bases and real-world data in clinical decision support systems: report by an international        | Does not satisfy OECD definition of artificial intelligence |
| 2019 | Journal of Digital Imaging                                                                  | Artificial Intelligence in Health Care: Identifying a Reason for Reaction of Best Practice Recommendations in Pneumonia triage                | Does not satisfy OECD definition of artificial intelligence |
| 2019 | Journal of the American College of Radiology                                                | Bending the Artificial Intelligence Curve for Radiology: Informatics Tools From ACK and RSNA                                                  | Does not satisfy OECD definition of artificial intelligence |
| 2019 | British Journal of Clinical Radiology                                                       | A Model to Support Shared Decision Making in Electronic Health Records Systems                                                                | Does not satisfy OECD definition of artificial intelligence |
| 2019 | BMI Open                                                                                    | Screening for Oral Cavity Cancer Using Economic and Machine Learning (SAE) a pilot study                                                      | Does not satisfy OECD definition of artificial intelligence |
| 2019 | Journal of Biomedical Informatics                                                           | Artificial Intelligence in Clinical Decision Support: A Review of Current Applications and Practical Implications                             | Does not satisfy OECD definition of artificial intelligence |
| 2019 | COMPUTERS INFORMATION SCIENCES NURSING                                                      | Development of a Tobacco Cessation Clinical Decision Support System for Pediatric Emergency Nurses                                            | Does not satisfy OECD definition of artificial intelligence |
| 2019 | American Journal of Preventive Medicine                                                     | An Electronic Health Record-aided Decision Support System to Address Child Tobacco Smoke Exposure                                             | Does not satisfy OECD definition of artificial intelligence |
| 2019 | BUILDING CAPACITY FOR HEALTH INFORMATION IN THE FUTURE                                      | Evaluation of Electronic Prescription Decision Support System at a Tertiary Care Pediatric Hospital: The User Acceptance Perspective          | Does not satisfy OECD definition of artificial intelligence |
| 2019 | UNFALCHURIG                                                                                 | Computer-assisted decision-making for trauma patients                                                                                         | Does not satisfy OECD definition of artificial intelligence |
| 2019 | Yearbook of medical informatics                                                             | An Open Science Approach to Artificial Intelligence in Healthcare                                                                             | Does not satisfy OECD definition of artificial intelligence |
| 2019 | Yearbook of medical informatics                                                             | Through Patients' Eyes: Redesigning Technology for Patient Transformation in the Era of Digital Health, Big Data, and the Internet of         | Does not satisfy OECD definition of artificial intelligence |
| 2019 | Circulation                                                                                 | Mobile Health Devices as Tools for Worldwide Cardiovascular Risk Reduction and Disease Management                                             | Does not satisfy OECD definition of artificial intelligence |
| 2019 | Academic Emergency Medicine                                                                 | Utility of the Massachusetts Prescription Drug Monitoring Program in the Emergency Department: A Mixed-methods Study                          | Does not satisfy OECD definition of artificial intelligence |
| 2019 | Journal of Health, Behavior, Society and Informatics                                        | My Data, My Choice? - Guidelines for Patient Empowerment: Big Data Driven Approaches in Personalized Medicine. An Empir                       | Does not satisfy OECD definition of artificial intelligence |
| 2019 | Clinical Radiology                                                                          | From hype to hope to hard work: developing responsible AI for radiology                                                                       | Does not satisfy OECD definition of artificial intelligence |
| 2019 | Journal of Biomedical Informatics                                                           | User-centered model for designing consumer mobile health (mHealth) applications (apps)                                                        | Does not satisfy OECD definition of artificial intelligence |
| 2019 | AIOS Care                                                                                   | Interest in use of mHealth technology in HIV prevention and associated factors among high-risk drug users enrolled in methadone mainte        | Does not satisfy OECD definition of artificial intelligence |
| 2019 | BUILDING CONTINENTS OF KNOWLEDGE IN OCEANS OF DATA                                          | Artificial Intelligence in Health Care: Identifying a Reason for Reaction of Best Practice Recommendations in Pneumonia triage                | Does not satisfy OECD definition of artificial intelligence |
| 2019 | Yearbook of medical informatics                                                             | Health Information Management: Implications of Artificial Intelligence on Healthcare Data and Information Management                          | Does not satisfy OECD definition of artificial intelligence |
| 2019 | Health Action                                                                               | Health workers' knowledge of and attitudes towards computer applications in rural African health facilities                                   | Does not satisfy OECD definition of artificial intelligence |
| 2019 | AMIA Symposium Proceedings/AMIA Symposium                                                   | How could artificial intelligence aid the fight against coronavirus? An interview with N. H. M. Yassin and Dr. Zubair Shah by Felicity Po     | Does not satisfy OECD definition of artificial intelligence |
| 2019 | CLIMATIC                                                                                    | Artificial intelligence and women's health                                                                                                    | Does not satisfy OECD definition of artificial intelligence |
| 2019 | Proc IEEE Int Symp Image, Imagin                                                            | Optimization of Sample Size and Priors in Model Based Deep Learning (C- Procedures - International Symposium on Biomed                        | Does not satisfy OECD definition of artificial intelligence |
| 2019 | ENDOSCOP                                                                                    | Establishing key research questions for the implementation of artificial intelligence in colonoscopy: a modified Delphi method                | Does not satisfy OECD definition of artificial intelligence |
| 2019 | Techniques in Gastrointestinal Endoscopy                                                    | Barriers and pitfalls for artificial intelligence in gastroenterology: Clinical and regulatory issues                                         | Does not satisfy OECD definition of artificial intelligence |
| 2019 | COMMUNICATIONS BIOLOGY                                                                      | At the intersection of machine learning, biology, and health: an interview with Loren Crawford                                                | Does not satisfy OECD definition of artificial intelligence |
| 2019 | Informatics in Medicine                                                                     | Patient-related risk factor generation using machine learning                                                                                 | Does not satisfy OECD definition of artificial intelligence |
| 2019 | Research in Nursing & Health                                                                | Responding to intimate partner violence: Healthcare providers' current practices and views on integrating a safety decision aid into the      | Does not satisfy OECD definition of artificial intelligence |
| 2019 | BMJ Medical Research and Decision Making                                                    | Explaining for artificial intelligence in healthcare: a multidisciplinary perspective                                                         | Does not satisfy OECD definition of artificial intelligence |
| 2019 | Effects of Integrated Support on the Performance of Radiologists in a Realistic Examination | Artificial Intelligence-Assisted System in Postoperative Follow-up of Orthopedic Patients: Exploratory Quantitative and Qualitative           | Does not satisfy OECD definition of artificial intelligence |
| 2019 | International Journal of Drug Policy                                                        | Enacting a more-than-human care: Clients and counselors views on the multiple affordances of chatbots in alcohol and other drug trea          | Does not satisfy OECD definition of artificial intelligence |
| 2019 | Seminars in Thoracic & Cardiovascular Surgery                                               | Artificial Intelligence in Acute Surgery: The Rise of the Machine                                                                             | Does not satisfy OECD definition of artificial intelligence |
| 2019 | Artificial Intelligence in Radiology: State of the Art and Future Directions                | Artificial intelligence in radiology: State of the art and future directions                                                                  | Does not satisfy OECD definition of artificial intelligence |
| 2019 | EUROPEAN JOURNAL OF HOSPITAL PHARMACY                                                       | Mixed methods study of medication-related decision support experience during electronic prescribing for inpatients at an English i            | Does not satisfy OECD definition of artificial intelligence |
| 2019 | Biomed Research International                                                               | Big Data Analytics in Healthcare                                                                                                              | Does not satisfy OECD definition of artificial intelligence |
| 2019 | BSPHCH OPEN                                                                                 | Using a simulation center to evaluate preliminary acceptability and impact of an artificial intelligence-powered clinical decision support    | Does not satisfy OECD definition of artificial intelligence |
| 2019 | Journal of the American College of Cardiology                                               | Artificial Intelligence-Assisted System in Postoperative Follow-up of Orthopedic Patients: Exploratory Quantitative and Qualitative           | Does not satisfy OECD definition of artificial intelligence |
| 2019 | PLoS ONE                                                                                    | Artificial Intelligence-Assisted System in Postoperative Follow-up of Orthopedic Patients: Exploratory Quantitative and Qualitative           | Does not satisfy OECD definition of artificial intelligence |
| 2019 | PROCEEDINGS OF THE 2021 ACM CONFERENCE ON FAIRNESS, ACCO                                    | A Pilot Study in Supporting Clinical Judgments to Evaluate Radiology Report Generation                                                        | Does not satisfy OECD definition of artificial intelligence |
| 2019 | Surgey (United States)                                                                      | Comparing clinical judgement with the MySurgEye algorithm for preoperative risk assessment: A pilot usability study                           | Does not satisfy OECD definition of artificial intelligence |
| 2019 | Journal of Medical Imaging & Radiation Sciences                                             | Artificial Intelligence in Radiology: State of the Art and Future Directions                                                                  | Does not satisfy OECD definition of artificial intelligence |
| 2019 | ADMINISTRATION AND POLICY IN PUBLIC HEALTH AND MENT                                         | Three Flavourings for a Cure to Cure what Ails Mental Health                                                                                  | Does not satisfy OECD definition of artificial intelligence |
| 2019 | 4th International Conference on Computer Science and Health                                 | Diagnose an Electronic Stethoscope for Respiratory Audio Analysis                                                                             | Does not satisfy OECD definition of artificial intelligence |
| 2019 | Health Psychology Research                                                                  | Health psychology: The use of new technologies in the service of psychological well-being and health empowerment                              | Does not satisfy OECD definition of artificial intelligence |
| 2019 | Journal of Community Health                                                                 | Need Assessment for Support for an Urban Population                                                                                           | Does not satisfy OECD definition of artificial intelligence |
| 2019 | Physics Medicine                                                                            | AI applications to medical images: From machine learning to deep learning                                                                     | Does not satisfy OECD definition of artificial intelligence |
| 2019 | Current Opinion in Nephrology & Hypertension                                                | Applications of machine learning images in kidney disease: hope or hype?                                                                      | Does not satisfy OECD definition of artificial intelligence |
| 2019 | Health Informatics and Clinical Informatics                                                 | Data ambiguity and clinical decision-making: A qualitative study of predictive information technologies in personalized medicine              | Does not satisfy OECD definition of artificial intelligence |
| 2019 | Journal of Pathology                                                                        | Artificial intelligence in digital pathology: a roadmap to routine use in clinical practice                                                   | Does not satisfy OECD definition of artificial intelligence |
| 2019 | Nursing Older People                                                                        | Digital health technology: factors affecting implementation in nursing homes                                                                  | Does not satisfy OECD definition of artificial intelligence |
| 2019 | Perceptions of nursing professionals and Carpas de Oliveira, Joao Lucas and Sotriani Cam    | Artificial intelligence in radiology: State of the art and future directions                                                                  | Does not satisfy OECD definition of artificial intelligence |
| 2019 | Current Cardiology Reports                                                                  | Artificial intelligence in medicine and cardiac imaging: harnessing big data and advanced computing to provide personalized medical diag      | Does not satisfy OECD definition of artificial intelligence |
| 2019 | International Journal of Integrated Care (IJIC)                                             | Development of a Computerized Integrated Care-Pathway System to Support People-Centred and Integrated Care: Usefulness of the Parti           | Does not satisfy OECD definition of artificial intelligence |
| 2019 | Surgey (United States)                                                                      | Rights application, night resources, night algorithms: Using machine learning efficiency and effects in surgical systems where there are a    | Does not satisfy OECD definition of artificial intelligence |
| 2019 | Journal of the American Medical Association                                                 | Artificial Intelligence-Assisted System in Postoperative Follow-up of Orthopedic Patients: Exploratory Quantitative and Qualitative           | Does not satisfy OECD definition of artificial intelligence |
| 2019 | Clinical Psychologist                                                                       | The impact and utility of computerized therapy for educationally talented teenagers: The views of adolescents who participated in an a        | Does not satisfy OECD definition of artificial intelligence |
| 2019 | BIOLOGICALLY INSPIRED COGNITIVE ARCHITECTURES (BICA)                                        | Artificial Intelligence in Radiology: State of the Art and Future Directions                                                                  | Does not satisfy OECD definition of artificial intelligence |
| 2019 | Health Informatics and Clinical Informatics                                                 | Artificial intelligence in radiology: State of the art and future directions                                                                  | Does not satisfy OECD definition of artificial intelligence |
| 2019 | Neurology India                                                                             | Artificial intelligence in neurosciences: A clinician's perspective                                                                           | Does not satisfy OECD definition of artificial intelligence |
| 2019 | Korean Journal of Women Health Nursing                                                      | Artificial intelligence, machine learning, and deep learning in women's health nursing                                                        | Does not satisfy OECD definition of artificial intelligence |
| 2019 | China                                                                                       | Artificial intelligence in pediatric nursing                                                                                                  | Does not satisfy OECD definition of artificial intelligence |
| 2019 | IRMI PUBLIC HEALTH AND SURVEILLANCE                                                         | Perception of the Progressing Diagnosis and Transformation of the German Health System Among Experts and the Public: Mixed M                  | Does not satisfy OECD definition of artificial intelligence |
| 2019 | Proceedings of the 2018 Designing Interactive Systems (DIS)                                 | It's hard to argue with a computer? Investigating Psychopaths' Attitudes towards Automated Evaluation                                         | Does not satisfy OECD definition of artificial intelligence |
| 2019 | International Journal of Medical Informatics                                                | Physicians' perspectives of adopting computer-assisted navigation in orthopedic surgery                                                       | Does not satisfy OECD definition of artificial intelligence |
| 2019 | Journal of the American Medical Association                                                 | Developing a Decision Aid Website for Breast Cancer Care: An Action Research Approach                                                         | Does not satisfy OECD definition of artificial intelligence |
| 2019 | AMERICAN JOURNAL OF MANAGED CARE                                                            | What Accounts for the High Cost of Care? It's the People                                                                                      | Does not satisfy OECD definition of artificial intelligence |
| 2019 | International Journal of Radiation Oncology, Biology, Physics                               | Machine Learning Approaches for Predicting Radiation Therapy Outcomes: A Clinician's Perspective                                              | Does not satisfy OECD definition of artificial intelligence |
| 2019 | Theoretical Medicine and Bioethics                                                          | Theoretical Medicine and Bioethics                                                                                                            | Does not satisfy OECD definition of artificial intelligence |
| 2019 | Rheumatology International                                                                  | Digital health: a new dimension in rheumatology patient care                                                                                  | Does not satisfy OECD definition of artificial intelligence |
| 2019 | JOURNAL OF MEDICAL INTELLIGENCE AND HEALTH CARE                                             | Current Challenges of Digital Health Interventions in Pakistan: Mixed Methods Analysis                                                        | Does not satisfy OECD definition of artificial intelligence |
| 2019 | Algorithms, Algorithms, and Algorithms                                                      | Following up on the move: how mobile apps remediate the digital divide                                                                        | Does not satisfy OECD definition of artificial intelligence |
| 2019 | Studies in Health Technology & Informatics                                                  | Follow-up on the Abnormal Laboratory Test Results with Automated Interpretation                                                               | Does not satisfy OECD definition of artificial intelligence |
| 2019 | Studies in Health Technology & Informatics                                                  | Automatic interpretation of Laboratory Tests and its Influence on Follow-up                                                                   | Does not satisfy OECD definition of artificial intelligence |
| 2019 | JOURNAL OF EVALUATION IN CLINICAL PRACTICE                                                  | Co-designing diagnosis: Towards a responsible integration of Machine Learning decision support systems in medical diagnostics                 | Does not satisfy OECD definition of artificial intelligence |
| 2019 | European Society of Radiology                                                               | Real-time computer-aided diagnosis for planning and prediction of postoperative changes                                                       | Does not satisfy OECD definition of artificial intelligence |
| 2019 | NPJ DIGITAL MEDICINE                                                                        | Developing a delivery service for artificial intelligence in healthcare                                                                       | Does not satisfy OECD definition of artificial intelligence |
| 2019 | Proceedings of the ACM Turing Celebration Conference - China                                | Research on the Influencing Factors of User Trust Based on Artificial Intelligence Self-Diagnosis System                                      | Does not satisfy OECD definition of artificial intelligence |
| 2019 | Annals of Medical Informatics                                                               | The future of artificial intelligence is bracing headwind                                                                                     | Does not satisfy OECD definition of artificial intelligence |
| 2019 | European Journal of Radiology                                                               | The future of radiology augmented with Artificial Intelligence: A strategy for success                                                        | Does not satisfy OECD definition of artificial intelligence |
| 2019 | Journal of Surgical Research                                                                | Intelligent, Autonomous Machines in Surgery                                                                                                   | Does not satisfy OECD definition of artificial intelligence |
| 2019 | Journal of Biomedical Informatics                                                           | Artificial intelligence in surgery: A brave new world - overview of prediction tools and the development of a decision support tool           | Does not satisfy OECD definition of artificial intelligence |
| 2019 | Journal of Health Organization & Management                                                 | Digital support for medication administration - a means for reaching the goal of providing good care?                                         | Does not satisfy OECD definition of artificial intelligence |
| 2019 | Journal of Global Health                                                                    | Increasing use of mental health services in remote areas using mobile technology: A pre- post evaluation of the SMART Mental Health Pro       | Does not satisfy OECD definition of artificial intelligence |
| 2019 | PLoS ONE [Electronic Resource]                                                              | The Systematic Medical Appraisal, Referral and Treatment (SMART) Mental Health Project: Development and Testing of Electronic Decisio         | Does not satisfy OECD definition of artificial intelligence |
| 2019 | Health Record, and Artificial Intelligence in Health                                        | Machine Learning Approaches for Predicting Radiation Therapy Outcomes: A Clinician's Perspective                                              | Does not satisfy OECD definition of artificial intelligence |
| 2019 | Clinical Biochemistry                                                                       | The future of artificial intelligence and integrative specialization in clinical biochemistry                                                 | Does not satisfy OECD definition of artificial intelligence |
| 2019 | ICO clinical cancer informatics                                                             | Artificial Intelligence in Radiology: State of the Art and Future Directions                                                                  | Does not satisfy OECD definition of artificial intelligence |
| 2019 | Clinical Advances in Hematology & Oncology                                                  | Artificial intelligence in radiology: State of the art and future directions                                                                  | Does not satisfy OECD definition of artificial intelligence |
| 2019 | Radiotherapy                                                                                | Artificial Intelligence in Low- and Middle-Income Countries: Innovating Global Health Radiotherapy                                            | Does not satisfy OECD definition of artificial intelligence |
| 2019 | JOURNAL OF PAIN AND SYMPTOM MANAGEMENT                                                      | An Electronic Clinical Decision Support Tool to Assist Hospital Physicians with Prognosis: Development and Mixed Methods Evaluation           | Does not satisfy OECD definition of artificial intelligence |
| 2019 | BRITISH JOURNAL OF RADIOLOGY                                                                | Expanding the frontiers of artificial intelligence in radiology: A review of current applications and future directions                       | Does not satisfy OECD definition of artificial intelligence |
| 2019 | JOURNAL OF MAGNETIC RESONANCE IMAGING                                                       | Editorial for "10 Review Critiques of Radiological Artificial Intelligence (AI) Articles: Qualitative Thematic Analysis of Reviewer Critiques | Does not satisfy OECD definition of artificial intelligence |
| 2019 | OMICS JOURNAL OF INTEGRATIVE BIOLOGY                                                        | Digital Health Is Popular: Why We Need a Feminist Conceptual Lens on Determinants of Digital Health                                           | Does not satisfy OECD definition of artificial intelligence |
| 2019 | Circulation Research                                                                        | Artificial Intelligence in Hypertension: Seeing through Glass Walls                                                                           | Does not satisfy OECD definition of artificial intelligence |
| 2019 | Proceedings of the 13th ACM Conference on Health, Information, and Computing                | Challenges of Patients and Their Relatives Toward Artificial Intelligence in Health                                                           | Does not satisfy OECD definition of artificial intelligence |
| 2019 | Proc. ACM Interact. Mob. Wearable Ubiquitous Technol.                                       | HeartWatch: Accurate Low-Cost Non-Invasive ECG Monitoring Using Deep Neuron Embedded Geophones                                                | Does not satisfy OECD definition of artificial intelligence |
| 2019 | Journal of Diabetes Science & Technology                                                    | Low Bluetooth-Enabled Tablets Insulin Pump: A User Experience Design Approach for a Connected Digital Diabetes Management Platf               | Does not satisfy OECD definition of artificial intelligence |
| 2019 | Health Care Management                                                                      | Big data yield new horizons, challenges and opportunities                                                                                     | Does not satisfy OECD definition of artificial intelligence |
| 2019 | Health Care Management                                                                      | Big data yield new horizons, challenges and opportunities                                                                                     | Does not satisfy OECD definition of artificial intelligence |
| 2019 | Big Data Management in US Hospitals                                                         | Big Data Management in US Hospitals                                                                                                           | Does not satisfy OECD definition of artificial intelligence |
| 2019 | Big Data Management in US Hospitals                                                         | Big Data Management in US Hospitals                                                                                                           | Does not satisfy OECD definition of artificial intelligence |
| 2019 | Big Data Management in US Hospitals                                                         | Big Data Management in US Hospitals                                                                                                           | Does not satisfy OECD definition of artificial intelligence |
| 2019 | Big Data Management in US Hospitals                                                         | Big Data Management in US Hospitals                                                                                                           | Does not satisfy OECD definition of artificial intelligence |
| 2019 | Big Data Management in US Hospitals                                                         | Big Data Management in US Hospitals                                                                                                           | Does not satisfy OECD definition of artificial intelligence |
| 2019 | Big Data Management in US Hospitals                                                         | Big Data Management in US Hospitals                                                                                                           | Does not satisfy OECD definition of artificial intelligence |
| 2019 | Big Data Management in US Hospitals                                                         | Big Data Management in US Hospitals                                                                                                           | Does not satisfy OECD definition of artificial intelligence |
| 2019 | Big Data Management in US Hospitals                                                         | Big Data Management in US Hospitals                                                                                                           | Does not satisfy OECD definition of artificial intelligence |
| 2019 | Big Data Management in US Hospitals                                                         | Big Data Management in US Hospitals                                                                                                           | Does not satisfy OECD definition of artificial intelligence |
| 2019 | Big Data Management in US Hospitals                                                         | Big Data Management in US Hospitals                                                                                                           | Does not satisfy OECD definition of artificial intelligence |
| 2019 | Big Data Management in US Hospitals                                                         | Big Data Management in US Hospitals                                                                                                           | Does not satisfy OECD definition of artificial intelligence |
| 2019 | Big Data Management in US Hospitals                                                         | Big Data Management in US Hospitals                                                                                                           | Does not satisfy OECD definition of artificial intelligence |
| 2019 | Big Data Management in US Hospitals                                                         | Big Data Management in US Hospitals                                                                                                           | Does not satisfy OECD definition of artificial intelligence |
| 2019 | Big Data Management in US Hospitals                                                         | Big Data Management in US Hospitals                                                                                                           | Does not satisfy OECD definition of artificial intelligence |
| 2019 | Big Data Management in US Hospitals                                                         | Big Data Management in US Hospitals                                                                                                           | Does not satisfy OECD definition of artificial intelligence |
| 2019 | Big Data Management in US Hospitals                                                         | Big Data Management in US Hospitals                                                                                                           | Does not satisfy OECD definition of artificial intelligence |
| 2019 | Big Data Management in US Hospitals                                                         | Big Data Management in US Hospitals                                                                                                           | Does not satisfy OECD definition of artificial intelligence |
| 2019 | Big Data Management in US Hospitals                                                         | Big Data Management in US Hospitals                                                                                                           | Does not satisfy OECD definition of artificial intelligence |
| 2019 | Big Data Management in US Hospitals                                                         | Big Data Management in US Hospitals                                                                                                           | Does not satisfy OECD definition of artificial intelligence |
| 2019 | Big Data Management in US Hospitals                                                         | Big Data Management in US Hospitals                                                                                                           | Does not satisfy OECD definition of artificial intelligence |
| 2019 | Big Data Management in US Hospitals                                                         | Big Data Management in US Hospitals                                                                                                           | Does not satisfy OECD definition of artificial intelligence |
| 2019 | Big Data Management in US Hospitals                                                         | Big Data Management in US Hospitals                                                                                                           | Does not satisfy OECD definition of artificial intelligence |
| 2019 | Big Data Management in US Hospitals                                                         | Big Data Management in US Hospitals                                                                                                           | Does not satisfy OECD definition of artificial intelligence |
| 2019 | Big Data Management in US Hospitals                                                         | Big Data Management in US Hospitals                                                                                                           | Does not satisfy OECD definition of artificial intelligence |
| 2019 | Big Data Management in US Hospitals                                                         | Big Data Management in US Hospitals                                                                                                           | Does not satisfy OECD definition of artificial intelligence |
| 2019 | Big Data Management in US Hospitals                                                         | Big Data Management in US Hospitals                                                                                                           | Does not satisfy OECD definition of artificial intelligence |
| 2019 | Big Data Management in US Hospitals                                                         | Big Data Management in US Hospitals                                                                                                           | Does not satisfy OECD definition of artificial intelligence |
| 2019 | Big Data Management in US Hospitals                                                         | Big Data Management in US Hospitals                                                                                                           | Does not satisfy OECD definition of artificial intelligence |
| 2019 | Big Data Management in US Hospitals                                                         | Big Data Management in US Hospitals                                                                                                           | Does not satisfy OECD definition of artificial intelligence |
| 2019 | Big Data Management in US Hospitals                                                         | Big Data Management in US Hospitals                                                                                                           | Does not satisfy OECD definition of artificial intelligence |
| 2019 | Big Data Management in US Hospitals                                                         | Big Data Management in US Hospitals                                                                                                           | Does not satisfy OECD definition of artificial intelligence |
| 2019 | Big Data Management in US Hospitals                                                         | Big Data Management in US Hospitals                                                                                                           | Does not satisfy OECD definition of artificial intelligence |
| 2019 | Big Data Management in US Hospitals                                                         | Big Data Management in US Hospitals                                                                                                           | Does not satisfy OECD definition of artificial intelligence |
| 2019 | Big Data Management in US Hospitals                                                         | Big Data Management in US Hospitals                                                                                                           | Does not satisfy OECD definition of artificial intelligence |
| 2019 | Big Data Management in US Hospitals                                                         | Big Data Management in US Hospitals                                                                                                           | Does not satisfy OECD definition of artificial intelligence |
| 2019 | Big Data Management in US Hospitals                                                         | Big Data Management in US Hospitals                                                                                                           | Does not satisfy OECD definition of artificial intelligence |
| 2019 | Big Data Management in US Hospitals                                                         | Big Data Management in US Hospitals</                                                                                                         |                                                             |
